# Supplementary material for: Climate and Soil Properties Drive the Distribution of Minor and Trace Elements in Forest Soils of the Winter Olympic Core Area
Source: MDPI journal article supplement (doi:10.3390/biology14010082), 2025-01-16
Supplement: s1 [file biology-3381603-supplementary.pdf › biology-3381603-supplementary.pdf]

**Table S1.** Soil temperature and soil humidity of sampling sites (n=9).

| Forest | Month   | Soil temperature (°C) | Soil humidity (%) |
|--------|---------|-----------------------|-------------------|
| PS     | July    | 15.9                  | 60.1              |
|        | October | 15.2                  | 59.4              |
|        | January | -8.5                  | 44.0              |
|        | Apr     | 16.4                  | 44.8              |
| BP     | July    | 13.7                  | 56.0              |
|        | October | 6.0                   | 43.1              |
|        | January | -8.0                  | 24.3              |
|        | Apr     | 5.0                   | 34.4              |
| LP     | July    | 16.9                  | 61.9              |
|        | October | 12.6                  | 54.4              |
|        | January | -9.0                  | 46.3              |
|        | Apr     | 5.6                   | 55.1              |
| PA     | July    | 21.3                  | 66.4              |
|        | October | 15.4                  | 54.2              |
|        | January | -13.0                 | 33.3              |
|        | Apr     | 22.0                  | 41.0              |
| MF     | July    | 22.3                  | 75.3              |
|        | October | 15.1                  | 59.4              |
|        | January | -12.0                 | 30.7              |
|        | Apr     | 10.7                  | 31.0              |

**Table S2.** Variance analysis of soil chemical and physical properties between different forests and soil layers

| Forest | Horizon | pH <sub>(H<sub>2</sub>O)</sub> | Bulk density<br>(g/cm <sup>3</sup> ) | Soil porosity (%) | SOM(g/kg)    | AHN (mg/kg)     | AP (mg/kg)    |
|--------|---------|--------------------------------|--------------------------------------|-------------------|--------------|-----------------|---------------|
| PS     | A       | 6.82±0.07Aa                    | 1.02±0.07ABa                         | 49.68±7.63ABa     | 71.6±8.09Aa  | 299.69±89.09Aa  | 8.30±1.68Aa   |
|        | B       | 6.91±0.03Aa                    | 1.12±0.07ABa                         | 46.31±4.91ABa     | 77.7±12.63Aa | 298.15±112.93Aa | 9.82±1.77Aa   |
|        | C       | 6.95±0.15Aa                    | 1.12±0.13ABa                         | 46.36±5.47ABa     | 67.1±9.62Aa  | 230.81±92.68Aa  | 8.88±2.45Aa   |
| BP     | A       | 6.74±0.05Aa                    | 0.85±0.08Aa                          | 59.10±3.80Aa      | 70.0±2.51Aa  | 256.49±22.51Aa  | 9.02±1.22ABa  |
|        | B       | 6.65±0.06Aa                    | 1.02±0.04Aa                          | 50.89±0.98Aab     | 67.0±2.40Aa  | 249.86±21.40Aa  | 9.45±0.60ABa  |
|        | C       | 6.72±0.14Aa                    | 1.28±0.23Ab                          | 42.12±9.63Ab      | 49.0±6.65Ab  | 165.49±58.65Ab  | 11.59±4.24ABa |
| LP     | A       | 6.83±0.16Aa                    | 1.09±0.30ABa                         | 46.81±11.99ABa    | 53.7±3.41Ba  | 158.13±7.51Ba   | 11.68±3.78Ba  |
|        | B       | 7.00±0.14Aa                    | 1.12±0.04ABa                         | 46.12±2.07ABa     | 47.3±8.44Ba  | 149.18±16.74Ba  | 7.84±2.01Bb   |
|        | C       | 7.01±0.09Aa                    | 1.32±0.13ABa                         | 41.65±4.97ABa     | 40.0±3.21Bb  | 100.88±32.61Bb  | 8.76±1.13Bab  |
| PA     | A       | 6.84±0.15Aa                    | 1.25±0.08Ba                          | 42.87±9.45Ba      | 45.9±3.17Ba  | 136.60±37.77Ba  | 10.66±2.12ABa |
|        | B       | 6.91±0.08Aab                   | 1.40±0.03Bab                         | 38.38±8.68Ba      | 31.4±2.40Bb  | 80.05±28.40Bb   | 5.45±1.58ABb  |
|        | C       | 7.00±0.08Ab                    | 1.65±0.18Bb                          | 31.80±9.04Ba      | 13.0±2.20Bc  | 35.96±3.20Bc    | 4.31±0.80ABb  |
| MF     | A       | 6.40±0.23Ba                    | 0.79±0.02Aa                          | 61.58±17.12Aa     | 85.9±7.41Ca  | 393.58±60.57Ca  | 3.59±1.22Ca   |
|        | B       | 6.63±0.19Bb                    | 0.87±0.08Aa                          | 57.52±1.34Ab      | 68.2±3.67Cb  | 294.91±57.02Cb  | 9.26±1.13Cb   |
|        | C       | 6.34±0.05Ba                    | 1.13±0.08Ab                          | 47.47±5.05Ac      | 43.2±5.01Cc  | 188.92±76.01Cc  | 2.83±0.52Ca   |

Different uppercase letters indicate significant differences between soil types within the same soil layer ( $P < 0.05$ ), and different lowercase letters indicate significant differences among soil layers within the soil types ( $P < 0.05$ ). SOM is Soil organic matter, AHN is alkali-hydrolyzable nitrogen, AP is available phosphorus.

**Table S3.** Descriptive statistics of minor and trace element concentrations in soils of the five forests.

|                              | B       | Co      | Fe     | Mn      | V       | Cr      | Cu      | Ni      | Zn      | As      | Se      | Sn      |
|------------------------------|---------|---------|--------|---------|---------|---------|---------|---------|---------|---------|---------|---------|
|                              | (mg/kg) | (mg/kg) | (g/kg) | (mg/kg) |
| <b>PS</b>                    |         |         |        |         |         |         |         |         |         |         |         |         |
| Mean                         | 31.44   | 16.66   | 34.32  | 652.33  | 12.36   | 60.17   | 20.17   | 26.44   | 60.61   | 10.21   | 0.20    | 2.01    |
| Min                          | 27.20   | 15.70   | 31.90  | 605.00  | 11.80   | 57.00   | 18.00   | 25.00   | 54.00   | 9.36    | 0.15    | 1.47    |
| Max                          | 36.70   | 18.70   | 37.80  | 682.00  | 13.10   | 66.00   | 22.00   | 29.00   | 74.00   | 10.70   | 0.31    | 2.79    |
| Standard deviation           | 2.66    | 0.73    | 1.42   | 19.17   | 0.42    | 2.38    | 1.65    | 1.10    | 5.76    | 0.38    | 0.05    | 0.43    |
| Coefficient of Variation (%) | 8       | 4       | 4      | 3       | 3       | 4       | 8       | 4       | 1       | 4       | 27      | 21      |
| <b>BP</b>                    |         |         |        |         |         |         |         |         |         |         |         |         |
| Mean                         | 32.50   | 16.54   | 37.22  | 573.28  | 11.93   | 72.89   | 24.72   | 27.06   | 60.72   | 9.94    | 0.15    | 2.63    |
| Min                          | 26.90   | 15.50   | 32.90  | 523.00  | 10.50   | 63.00   | 19.00   | 24.00   | 52.00   | 8.47    | 0.11    | 1.63    |
| Max                          | 35.50   | 18.10   | 41.90  | 633.00  | 12.80   | 99.00   | 50.00   | 32.00   | 79.00   | 10.80   | 0.18    | 4.36    |
| Standard deviation           | 2.38    | 0.87    | 2.68   | 30.00   | 0.67    | 10.01   | 9.23    | 2.41    | 7.41    | 0.70    | 0.02    | 0.84    |
| Coefficient of Variation (%) | 7       | 5       | 7      | 5       | 6       | 14      | 37      | 9       | 12      | 7       | 14      | 32      |
| <b>LP</b>                    |         |         |        |         |         |         |         |         |         |         |         |         |
| Mean                         | 30.21   | 17.53   | 35.82  | 720.17  | 12.55   | 54.72   | 21.39   | 26.72   | 63.39   | 10.16   | 0.14    | 2.32    |
| Min                          | 25.70   | 16.30   | 33.20  | 621.00  | 11.90   | 34.00   | 18.00   | 24.00   | 59.00   | 9.64    | 0.10    | 1.62    |
| Max                          | 35.40   | 18.60   | 39.30  | 772.00  | 13.20   | 68.00   | 25.00   | 29.00   | 77.00   | 11.10   | 0.20    | 3.01    |
| Standard deviation           | 2.20    | 0.67    | 1.79   | 46.53   | 0.40    | 14.07   | 2.35    | 1.49    | 5.29    | 0.45    | 0.03    | 0.46    |
| Coefficient of Variation (%) | 7       | 4       | 5      | 6       | 3       | 26      | 11      | 6       | 8       | 4       | 20      | 20      |

**PA**

|                                 |       |       |       |        |       |       |       |       |       |       |      |      |
|---------------------------------|-------|-------|-------|--------|-------|-------|-------|-------|-------|-------|------|------|
| Mean                            | 28.52 | 15.85 | 32.87 | 577.44 | 16.89 | 54.61 | 17.28 | 23.39 | 56.89 | 9.25  | 0.12 | 1.55 |
| Min                             | 16.90 | 11.50 | 24.90 | 416.00 | 12.00 | 30.00 | 8.00  | 12.00 | 49.00 | 5.11  | 0.05 | 1.16 |
| Max                             | 33.60 | 17.50 | 36.70 | 630.00 | 36.00 | 64.00 | 20.00 | 27.00 | 68.00 | 11.10 | 0.24 | 2.24 |
| Standard deviation              | 4.64  | 1.65  | 3.37  | 63.44  | 7.05  | 9.94  | 3.66  | 4.41  | 6.15  | 1.60  | 0.05 | 0.25 |
| Coefficient of Variation<br>(%) | 16    | 10    | 10    | 11     | 42    | 18    | 21    | 19    | 11    | 17    | 42   | 16   |

**MF**

|                                 |       |       |       |        |       |       |       |       |       |       |      |      |
|---------------------------------|-------|-------|-------|--------|-------|-------|-------|-------|-------|-------|------|------|
| Mean                            | 30.24 | 16.18 | 36.58 | 614.00 | 12.33 | 67.89 | 21.00 | 25.89 | 61.67 | 9.13  | 0.14 | 2.27 |
| Min                             | 26.80 | 14.60 | 33.00 | 574.00 | 11.90 | 62.00 | 19.00 | 23.00 | 58.00 | 8.46  | 0.08 | 1.74 |
| Max                             | 34.90 | 17.80 | 39.10 | 684.00 | 12.80 | 74.00 | 24.00 | 29.00 | 68.00 | 10.30 | 0.20 | 3.49 |
| Standard deviation              | 2.59  | 0.81  | 1.79  | 33.50  | 0.31  | 3.86  | 1.71  | 1.60  | 3.27  | 0.51  | 0.04 | 0.46 |
| Coefficient of Variation<br>(%) | 9     | 5     | 5     | 5      | 3     | 6     | 8     | 6     | 5     | 6     | 27   | 20   |

---
